# Supplementary material for: Design of high performance p-type sensitizers with pyridinium derivatives as the acceptor by theoretical calculations
Source: Royal Society of Chemistry journal article supplement (doi:10.1039/d0ra00610f), 2020-01-01
Supplement: d0ra00610f1.pdf [file d0ra00610f1.pdf]

## Supporting information

### Design of high performance *p*-type sensitizers with pyridinium derivatives as acceptor by theoretical calculations

Zhi-Dan Sun,<sup>a</sup> Jiang-Shan Zhao,<sup>a</sup> Karuppasamy Ayyanar,<sup>a</sup> Xue-Hai Ju<sup>a\*</sup> and Qi-Ying Xia<sup>b\*</sup>

<sup>a</sup> Key Laboratory of Soft Chemistry and Functional Materials of MOE, School of Chemical Engineering, Nanjing University of Science and Technology, Nanjing 210094, P. R. China. Email: xhju@njust.edu.cn

<sup>b</sup> School of Chemistry and Chemical Engineering, Linyi University, Linyi, P. R. China.  
Email: xiaqiying@163.com

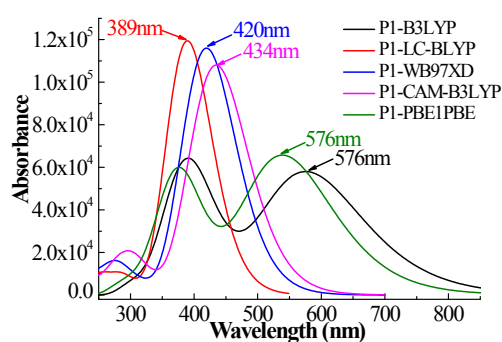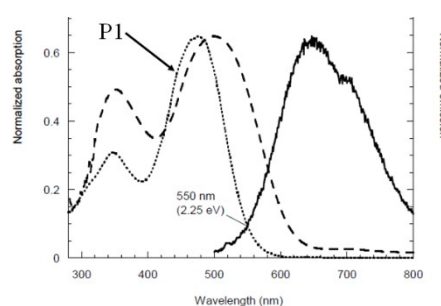

Absorption (dotted line) and emission (solid line) spectra of **P1** in MeCN.

Fig. S1 The simulated UV-vis absorption spectrum of **P1** by different functionals using the same basis set 6-311G\*\*, as well as its experimental spectrum

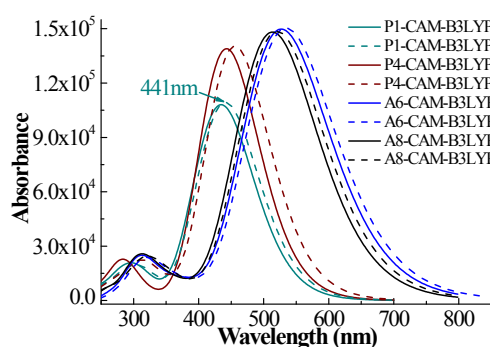

Fig. S2 The simulated UV-vis absorption spectra for some selected dyes at CAM-B3LYP/6-311++G\*\* level
